# Supplementary material for: Effect of high-intensity interval training and moderate-intensity continuous training on blood lactate clearance after high-intensity test in adult men
Source: Front Physiol. 2024 Sep 4;15:1451464. doi: 10.3389/fphys.2024.1451464 (PMC11413624; doi:10.3389/fphys.2024.1451464)
Supplement: Supplementary file 1 [file Table1.XLSX]

## Sheet: Sheet1
	无氧												有氧
Pre		1	2	3	4	5	6	7	8	9	10			1	2	3	4	5	6	7	8	9	10	11
	0min	14.6	13.3	13.5	17.9	10.8	14.2	13.8	14.3	13.6	14.9		0min	14.3	15.3	12.9	13.4	12.6	13.2	14.5	14	13.8	14.5	15.3
	5min	15.3	11.8	11.3	16	10	13.1	12.4	13.1	12.3	13.5		5min	11.9	12.3	16.5	15.5	14.3	11.2	12.3	12.6	11.6	13.2	13.9
	15min	7.9	7.9	8.6	11.4	7.4	9.1	7.7	9.3	8.1	9.6		15min	7.3	8.3	11.4	10.3	9.9	7.8	7.9	8.9	8.4	8.6	9.1
	30min	5.4	5.5	6.6	8.8	6.9	7.2	5.1	6.4	5.9	6.1		30min	5.1	6.4	8.1	7.1	6.8	5.7	5.9	6.1	5.6	6.3	6.4
	45min	3.1	2.9	3.5	4.9	4.7	4.2	2.9	3.9	3.5	3.8		45min	3	4.1	5.8	3.7	3.9	3.1	3.1	3.8	3.3	4.3	4.1
	55min	2.2	1.9	2.4	3.1	3.2	2.3	1.7	2.7	2.2	2.3		55min	2.3	2.6	3.2	3	2.6	1.9	1.8	2.2	2	2.9	2.7
	rest	1.9	1.9	2.1	2.1	2.2	1.8	1.5	1.9	1.8	1.9		rest	2.1	2.2	1.9	1.9	1.8	1.9	1.7	1.9	2	2.1	2.2
Mid	0min	13.5	11.5	13.7	15.5	11.1	13.9	13.1	13.2	12.9	13.6		0min	13.2	12.1	14.5	13.9	13.2	11.1	13.7	12.4	12.5	14.3	13.9
	5min	10.8	12.4	12.1	11.5	11.7	10.9	10.5	11.6	10.4	11.8		5min	11.2	9.5	15.1	14.4	12.6	12.7	10.2	9.1	10.4	11.2	11.3
	15min	6.3	8.7	7.9	9	8.5	7.8	7	7.4	6.9	7.8		15min	7.1	6.9	9.8	10.2	7.9	8.6	7.2	6.9	7.8	8.2	8.1
	30min	4.1	5.5	4.3	6.7	5.5	4.6	4.2	5.3	4.4	5.1		30min	4.3	4.2	6.1	6.9	4.6	5.6	4.7	4.5	4.9	5	5.6
	45min	2.1	2.7	3.3	3.2	3.1	2.6	2.2	3.1	2.5	3.4		45min	2.2	3.7	2.4	3.9	2.5	2.8	2.3	2.9	2.6	3.4	3.3
	55min	1.8	2	2.5	2.4	2.3	1.9	1.6	2.1	1.8	1.7		55min	2	2.2	1.9	2.2	2	1.9	1.7	1.9	2	2.6	2.4
	rest	1.8	2	2.1	1.9	2.1	1.8	1.6	1.8	1.8	1.7		rest	1.9	2	1.9	1.8	2	1.8	1.7	1.9	1.8	2.1	2.1
Post	0min	11	12.4	12.8	12	9.9	11.6	11.4	12.4	11.2	12.3		0min	9.8	12.2	10.9	12.1	10.8	11.9	11.5	11.4	11.4	12	12.3
	5min	11.3	9.6	8.9	12.6	10.1	8.7	9.4	10.9	9.8	10.6		5min	7.4	9	13.9	13.7	12.5	12.4	9.8	9.6	9.7	10.4	10.7
	15min	6.9	5.6	5.2	5.9	6.9	4.4	5	6.3	4.8	5.9		15min	4.7	5.9	7.6	7.9	6.2	6.7	6	6.2	6.6	7.3	7
	30min	2.8	3.2	3.3	3.5	3.4	2.2	2.7	3.1	2.4	3		30min	2.7	3.5	4.1	5.2	3	4.4	3.6	3.8	4	4.4	4.5
	45min	2	1.9	2.4	2.2	2	1.9	1.7	2.1	1.9	2.2		45min	2	2.6	2.1	2.7	1.9	2.6	1.8	2.4	2.3	2.1	2.2
	55min	1.7	1.9	2.3	1.9	1.9	2	1.6	2.1	1.8	1.8		55min	2	2.1	1.8	2	1.9	1.9	1.9	1.9	1.9	2.1	2.1
	rest	1.7	1.9	2.2	1.9	1.8	1.8	1.6	2	1.8	1.8		rest	2	2	1.8	1.9	1.9	1.8	1.8	1.8	1.9	2.1	2.1
Pre	VC(ml)	4198	5144	4667	5241	4480	3688	4458	5378	3980	4722		VC(ml)	5048	5053	4401	4100	4705	4544	3925	4475	5091	5229	4755
Post	VC(ml)	4725	5923	5183	5779	5086	4229	4933	5879	4498	5243		VC(ml)	5454	5588	4781	4517	5113	4876	4298	4821	5633	5784	5127
Pre	BFP(%)	16.8	19.8	17.2	18	20.5	16.9	17.3	19.4	20.8	17.9		BFP(%)	17.9	18.6	17.7	15.1	16.2	18.1	20.3	20.1	17.8	19.8	19.4
Post	BFP(%)	15.3	18.9	14.9	16.8	19.1	15.4	16.5	17.5	18.9	16.8		BFP(%)	16.9	17.1	16.1	14.1	15.1	16.5	18.1	18.9	16.3	17.3	18.1
